# Supplementary material for: Tumor dynamics in patients with solid tumors treated with pembrolizumab beyond disease progression
Source: PubMed Central journal article supplement — Cancer Cell. Author manuscript; Available in PMC 2024 Jul 8. (PMC11229185; doi:10.1016/j.ccell.2023.08.004), 2023-09-11

**Cancer Cell, Volume 41**

**Supplemental information**

**Tumor dynamics in patients with solid  
tumors treated with pembrolizumab  
beyond disease progression**

**Brian G. Topp, Madhav Channavazzala, Kapil Mayawala, Dinesh P. De Alwis, Eric Rubin, Alexandra Snyder, Jedd D. Wolchok, and Antoni Ribas**

## SUPPLEMENT

**Table SA1** Sum of Target Lesion Diameters and ORR per RECIST v1.1 in the Postprogression Period Among Patients Who Were TBP, related to Table 1

|                              | <b>SLD &gt;20%</b> | <b>SLD<br/>&lt;+20% to ≥30%</b> | <b>SLD &lt;30%</b> | <b>ORR, %</b> | <b>Time to SLD<br/>&lt;30%, median<br/>(range), weeks</b> | <b>TBP, median<br/>(range), weeks</b> |
|------------------------------|--------------------|---------------------------------|--------------------|---------------|-----------------------------------------------------------|---------------------------------------|
| Melanoma (KEYNOTE-001)       | 10.7%              | 64.8%                           | 24.4%              | 8.6%          | 12.0 (4.4-120.0)                                          | 18.4 (4.0-194.9)                      |
| NSCLC (KEYNOTE-001)          | 15.7%              | 72.6%                           | 11.6%              | 2.8%          | 9.4 (7.9-64.1)                                            | 12.5 (4.0-90.4)                       |
| Gastric cancer (KEYNOTE-059) | 18.4%              | 68.9%                           | 12.6%              | 1.1%          | 12.1 (5.3-54.0)                                           | 6.1 (4.0-72.7)                        |
| HNSCC (KEYNOTE-048)          | 15.2%              | 75.9%                           | 8.9%               | 0.9%          | 11.9 (6.0-39.4)                                           | 12.0 (4.0-150.4)                      |
| ccRCC (KEYNOTE-427)          | 11.8%              | 72.5%                           | 15.7%              | 9.8%          | 18.0 (6.0-47.7)                                           | 17.6 (4.0-108.7)                      |
| UC (KEYNOTE-052)             | 13.6%              | 74.4%                           | 12.0%              | 7.2%          | 12.0 (5.1-51.0)                                           | 10.6 (4.1-176.0)                      |
| UC (KEYNOTE-361)             | 8.8%               | 76.5%                           | 14.7%              | 2.9%          | 15.7 (5.1-131.0)                                          | 12.9 (4.0-154.3)                      |

Abbreviations: ccRCC, clear-cell renal cell carcinoma; HNSCC, head and neck squamous cell carcinoma; NSCLC, non-small cell lung cancer; ORR, objective response rate; SLD, sum of lesion diameters; UC, urothelial carcinoma.

**Fig SA1.** Inclusion criteria for patients, related to Figure 1. (A) melanoma, (B) NSCLC, (C) gastric cancer, (D) HNSCC, (E) ccRCC, (F) UC in KEYNOTE-052, and (G) UC in KEYNOTE-361ccRCC, clear-cell renal cell carcinoma; HNSCC, head and neck squamous cell carcinoma; NSCLC, non-small cell lung cancer; PD, progressive disease; UC, urothelial carcinoma.

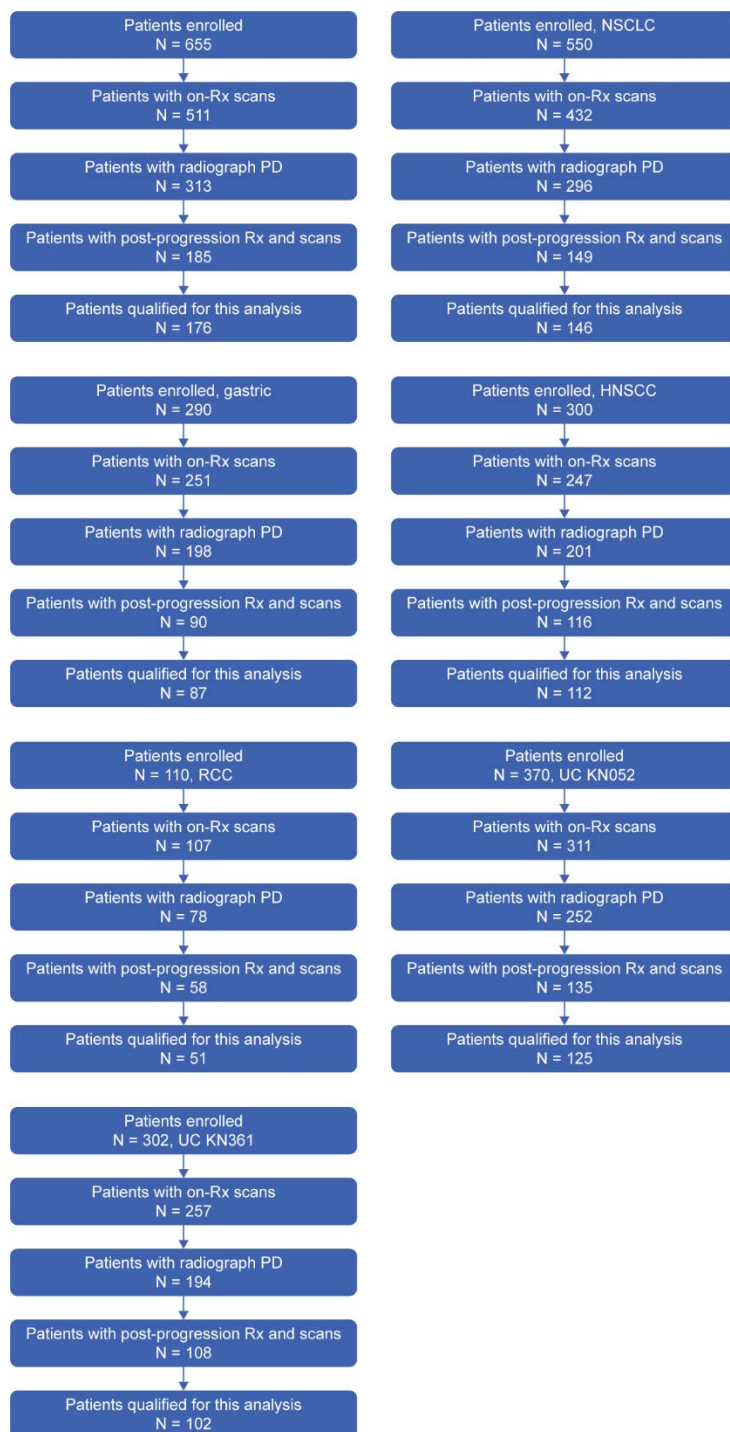

**Fig SA2.** Normalized Waterfall plots comparing patients included and excluded for TBP, related to Figure 2. (A) Melanoma, (B) NSCLC, (C) gastric cancer, (D) HNSCC, (E) ccRCC, (F) UC KEYNOTE-52, (G) UC KEYNOTE-361. ccRCC, clear-cell renal cell carcinoma; HNSCC, head and neck squamous cell carcinoma; NSCLC, non-small cell lung cancer; UC, urothelial carcinoma.

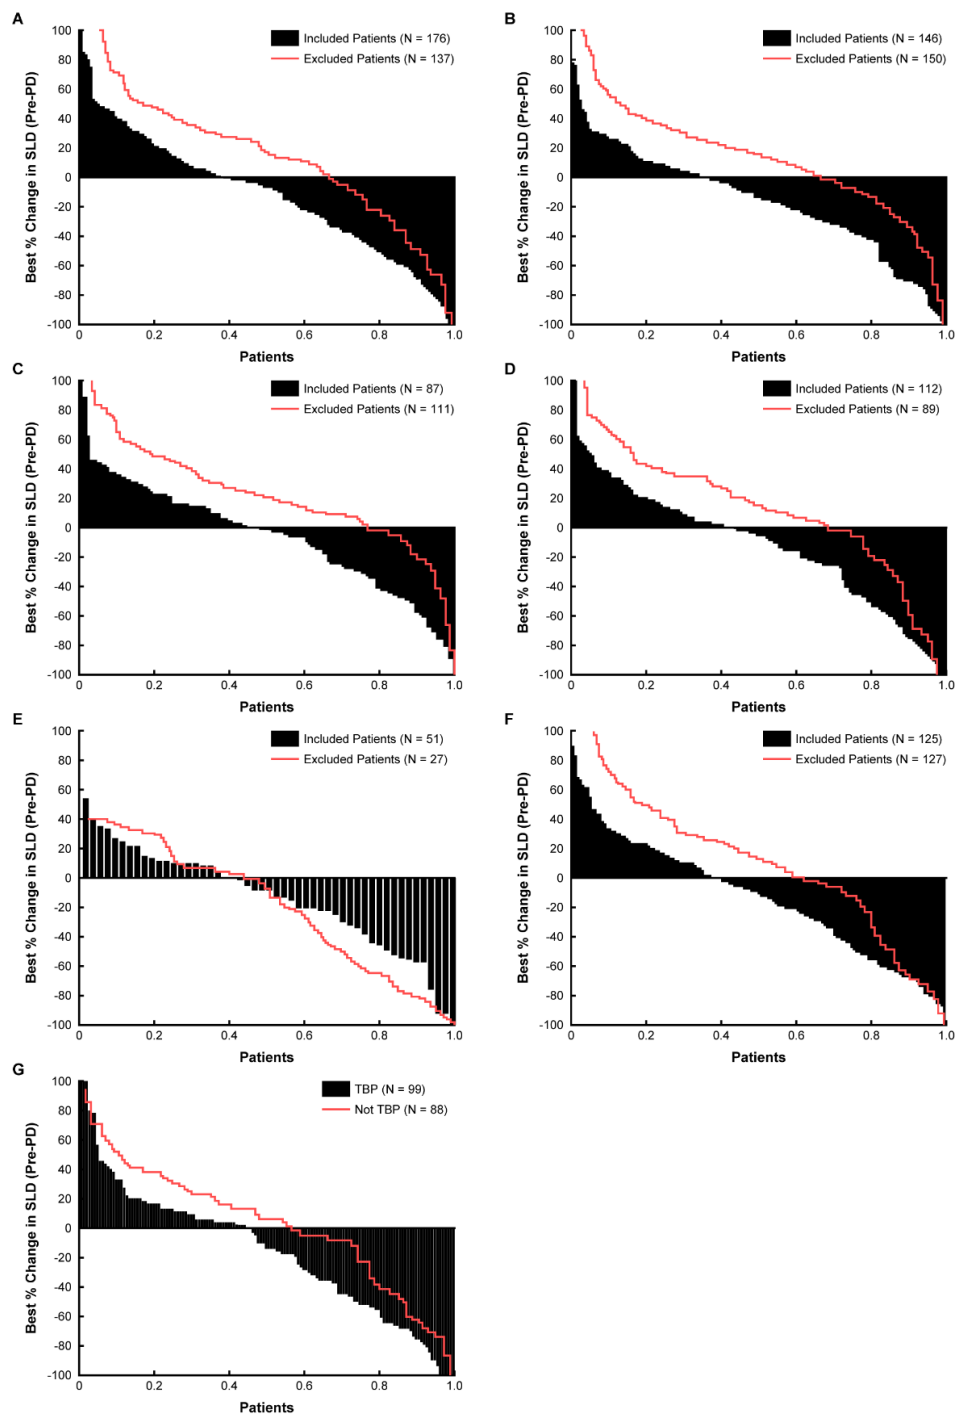

**Fig SA3.** Best overall response and time on trial after progression for patients, related to Figure 2. (A, B) HNSCC, (C, D) ccRCC, (E,F) UC in KEYNOTE-052, and (G,H) UC in KEYNOTE-361. ccRCC, clear-cell renal cell carcinoma; HNSCC, head and neck squamous cell carcinoma; NSCLC, non-small cell lung cancer; PD, progressive disease; UC, urothelial carcinoma.

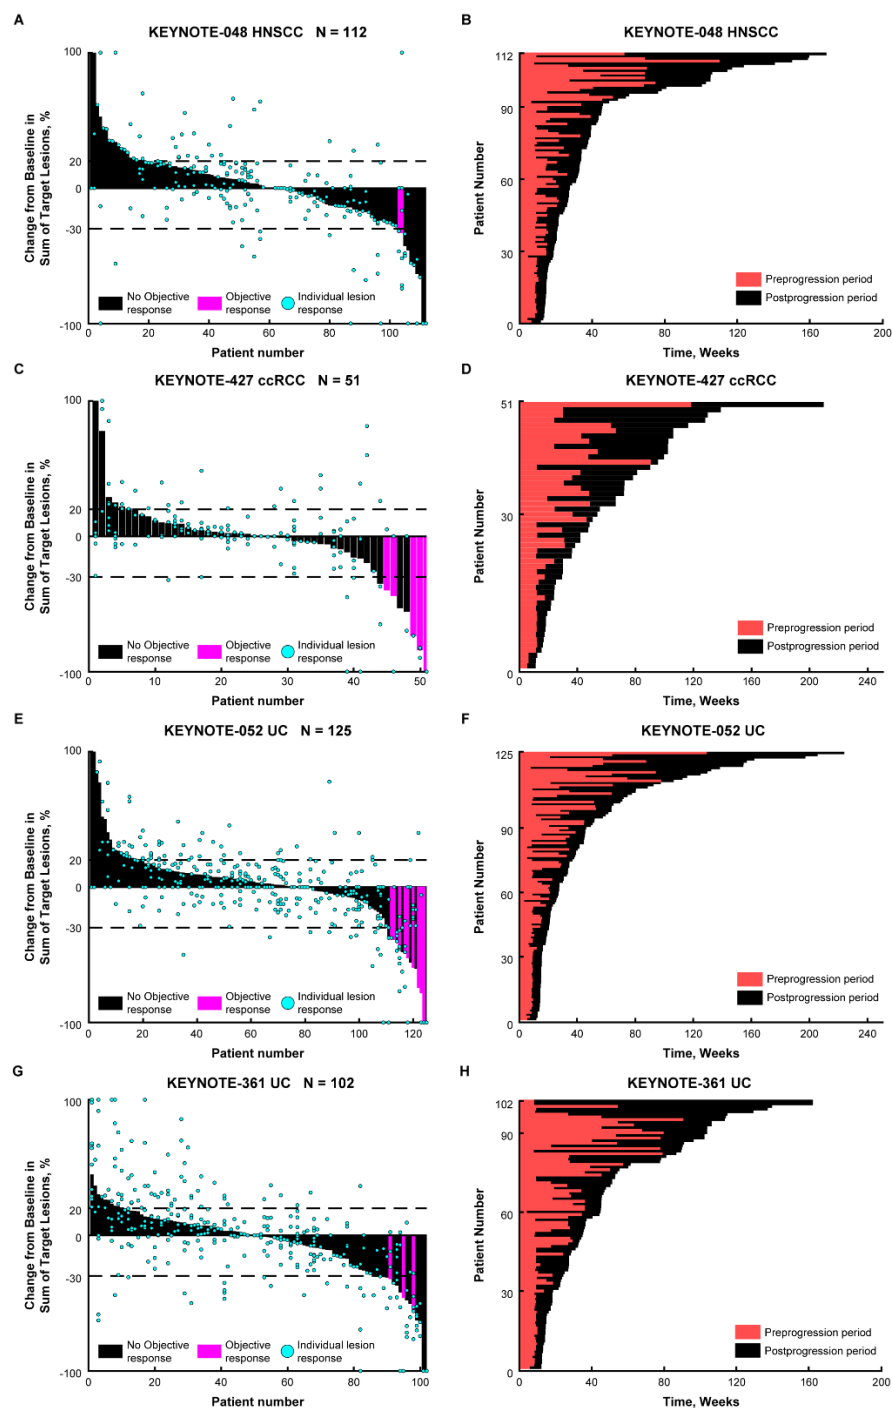

**Fig SA4.** Distribution of target lesion responses in preprogression and postprogression periods for patients with HNSCC, ccRCC, and UC, related to Figure 3. ccRCC, clear-cell renal cell carcinoma; HNSCC, head and neck squamous cell carcinoma; UC, urothelial carcinoma.

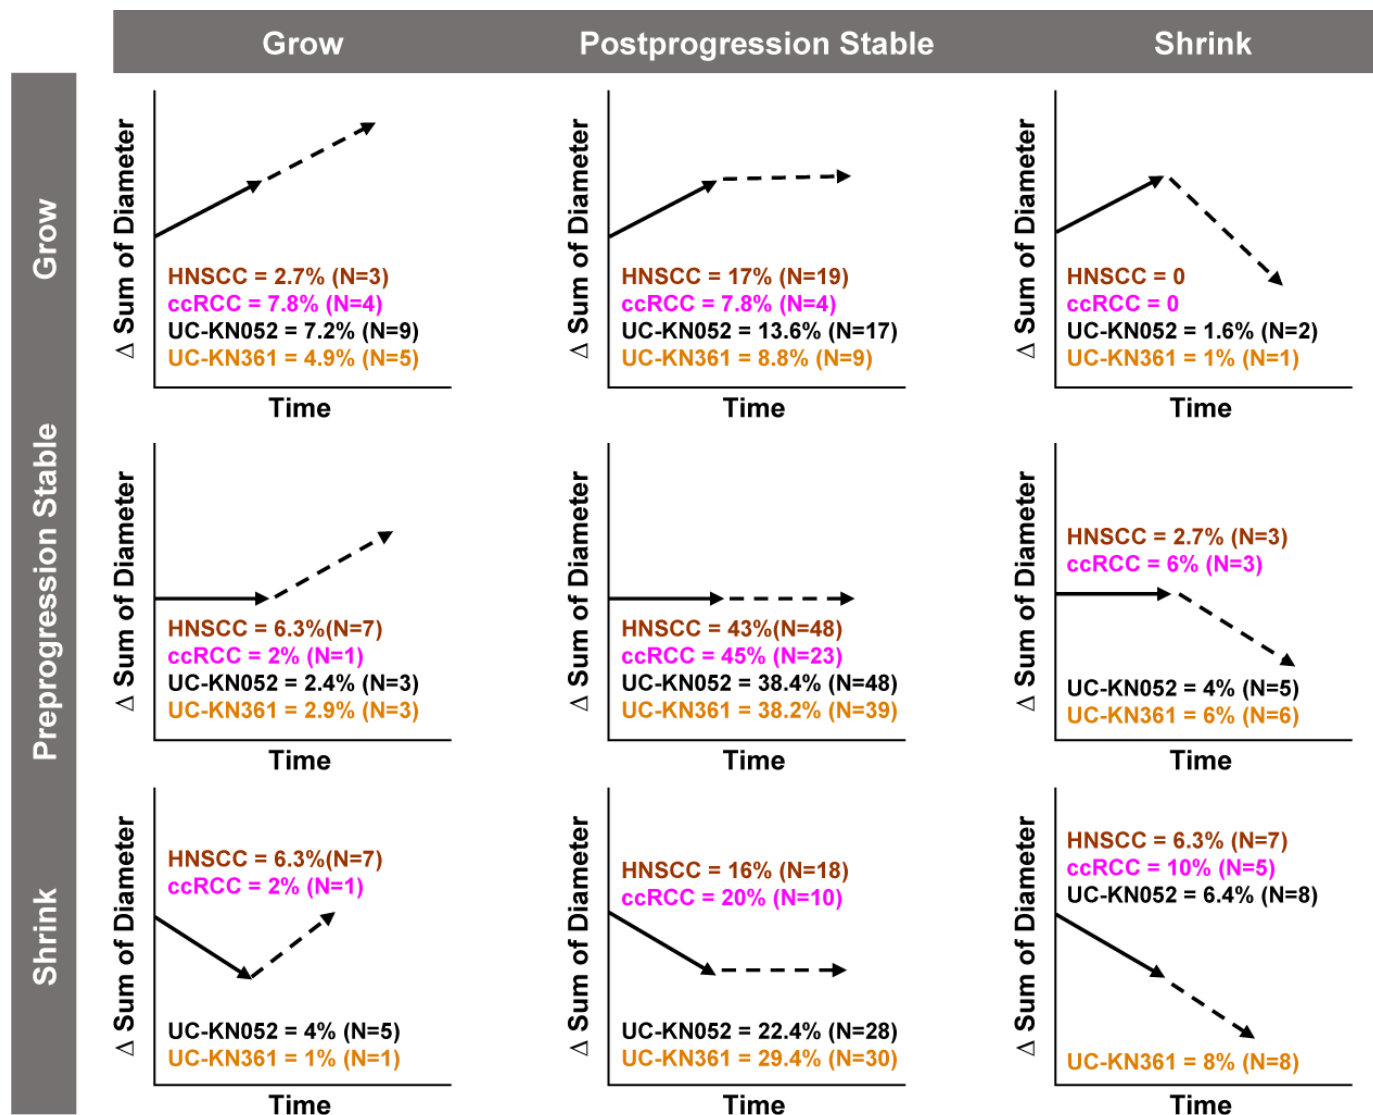

Supplement: NIHMS2006155-supplement-Supplemental.pdf [file NIHMS2006155-supplement-Supplemental.pdf]
